# Supplementary material for: Hydrogen peroxide assisted synthesis of fluorescent carbon nanoparticles from teak leaves for dye-sensitized solar cells
Source: Royal Society of Chemistry journal article supplement (doi:10.1039/d3su00452j), 2024-01-01
Supplement: d3su00452j1.pdf [file d3su00452j1.pdf]

## Supporting Informatic

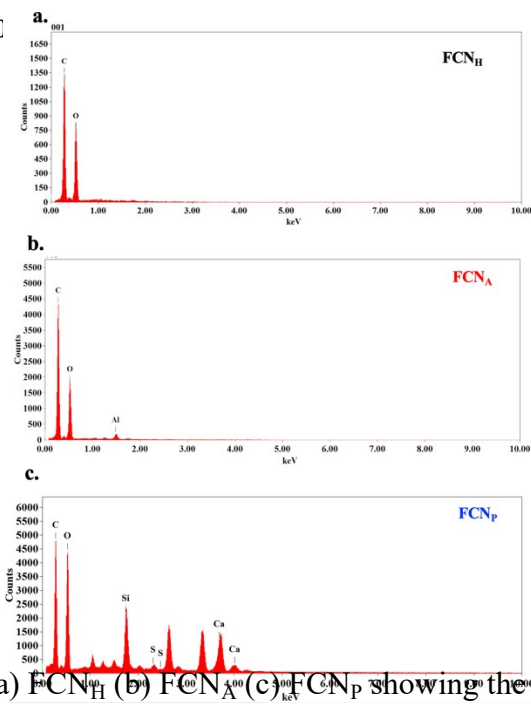

**Figure S1:** EDX data of (a) FCN<sub>H</sub> (b) FCN<sub>A</sub> (c) FCN<sub>P</sub> showing the percentages of the element present in each of them.

**Table S1:** EDX measurement of all FCNs

| EDX data         |         |         |
|------------------|---------|---------|
| Samples          | Mass %C | Mass %O |
| FCN <sub>H</sub> | 79.56   | 20.47   |
| FCN <sub>A</sub> | 81.59   | 16.52   |
| FCN <sub>P</sub> | 42.71   | 14.35   |

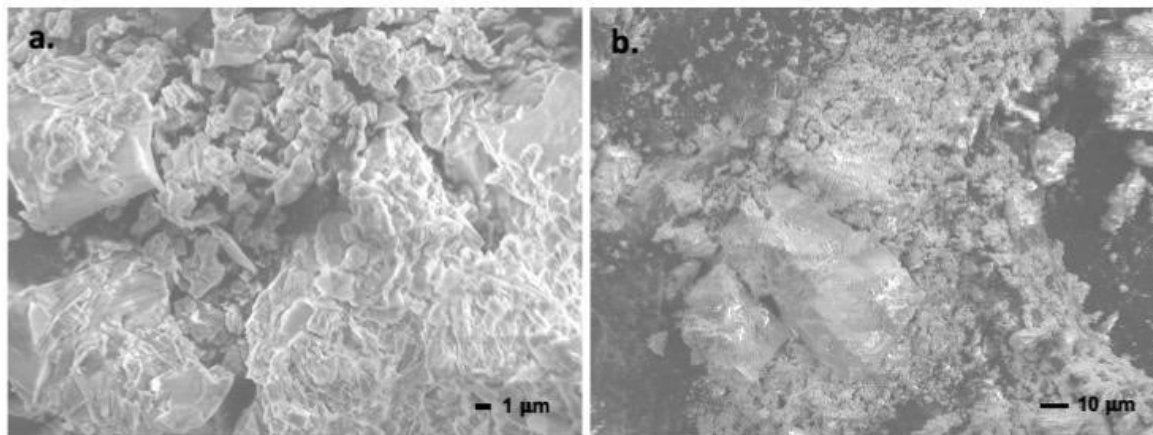

**Figure S2:** FE-SEM images of (a) FCN<sub>A</sub> (b) FCN<sub>P</sub>.

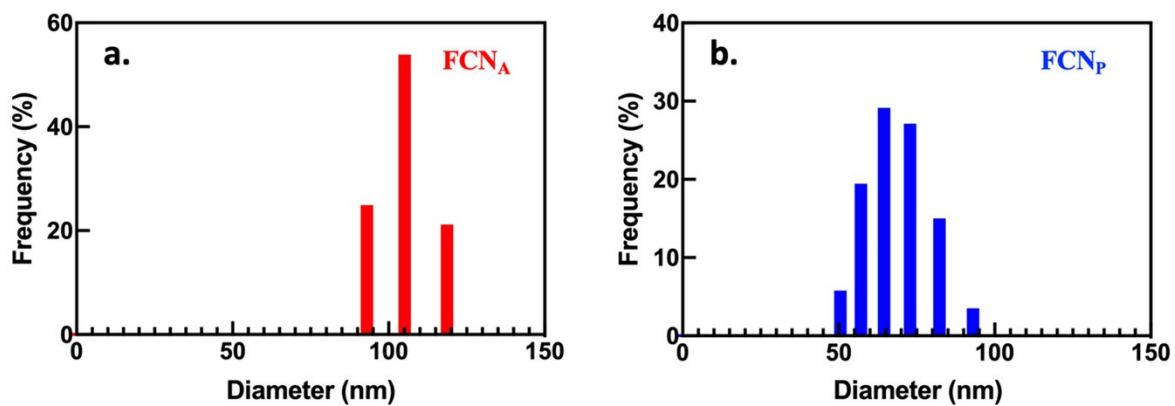

**Figure S3:** DLS data of (a)  $FCN_A$  (b)  $FCN_P$  showing the sizes the sizes of the nanoparticles in aqueous solution.
